# Supplementary material for: Systematic Screening of Associations between Medication Use and Risk of Neurodegenerative Diseases Using a Mendelian Randomization Approach
Source: MDPI journal article supplement (doi:10.3390/biomedicines11071930), 2023-07-07
Supplement: s1 [file s1]

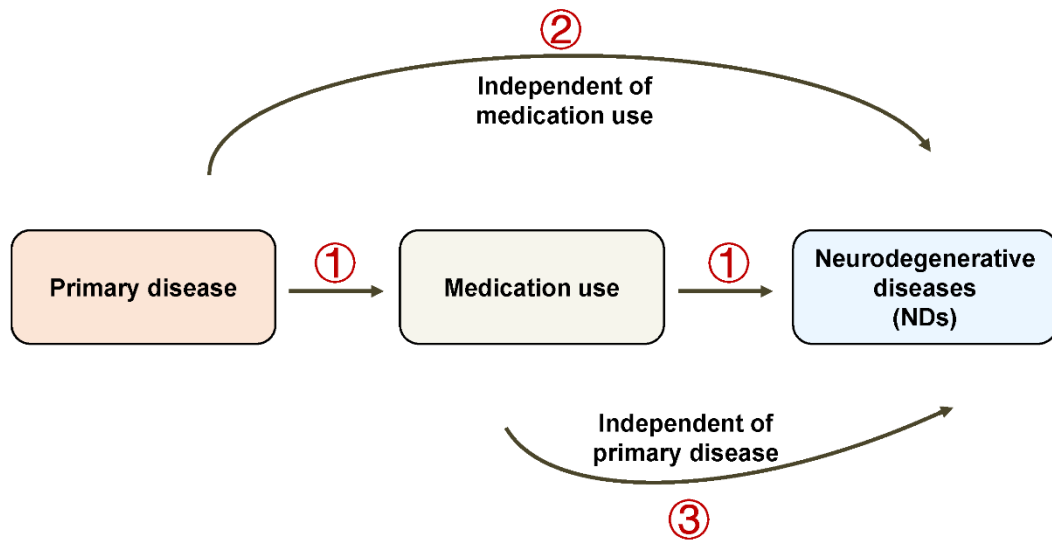

**Figure S1. Three possibilities when medication use is associated with NDs:** (1) the primary disease is associated with NDs independent of medication; (2) the association between primary disease is mediated by medication use; (3) the medication is associated with NDs independent of primary disease, for example, through side effects.

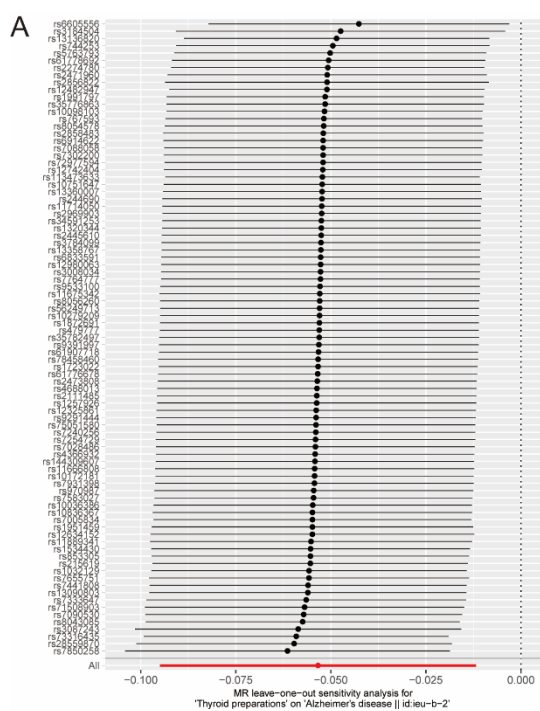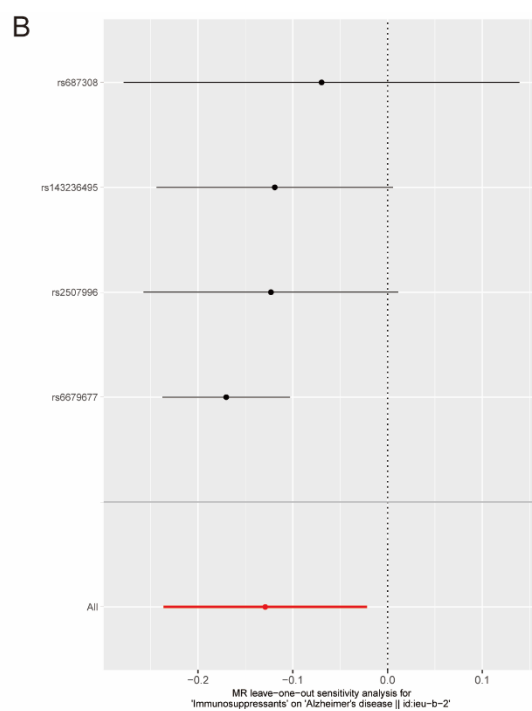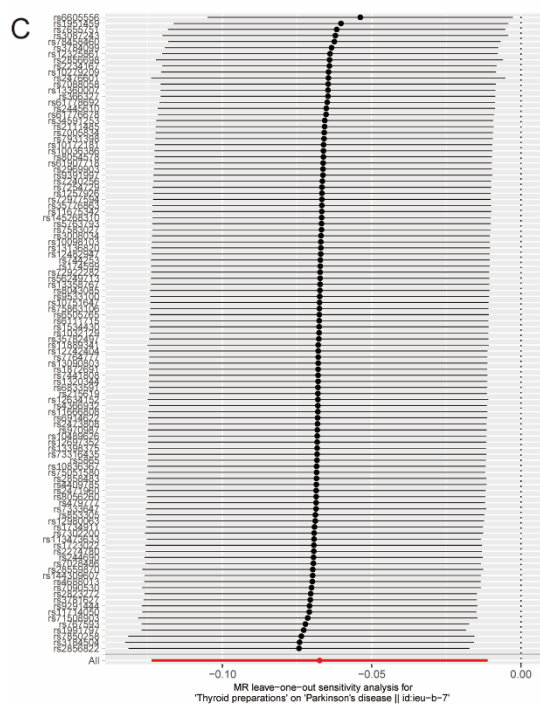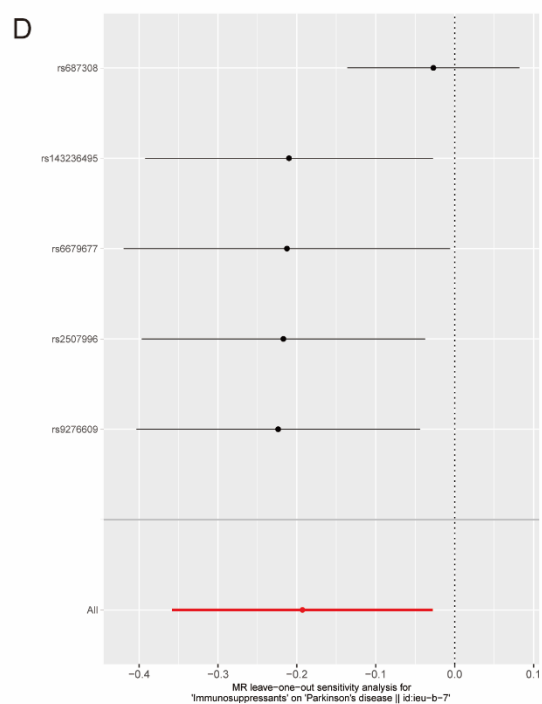

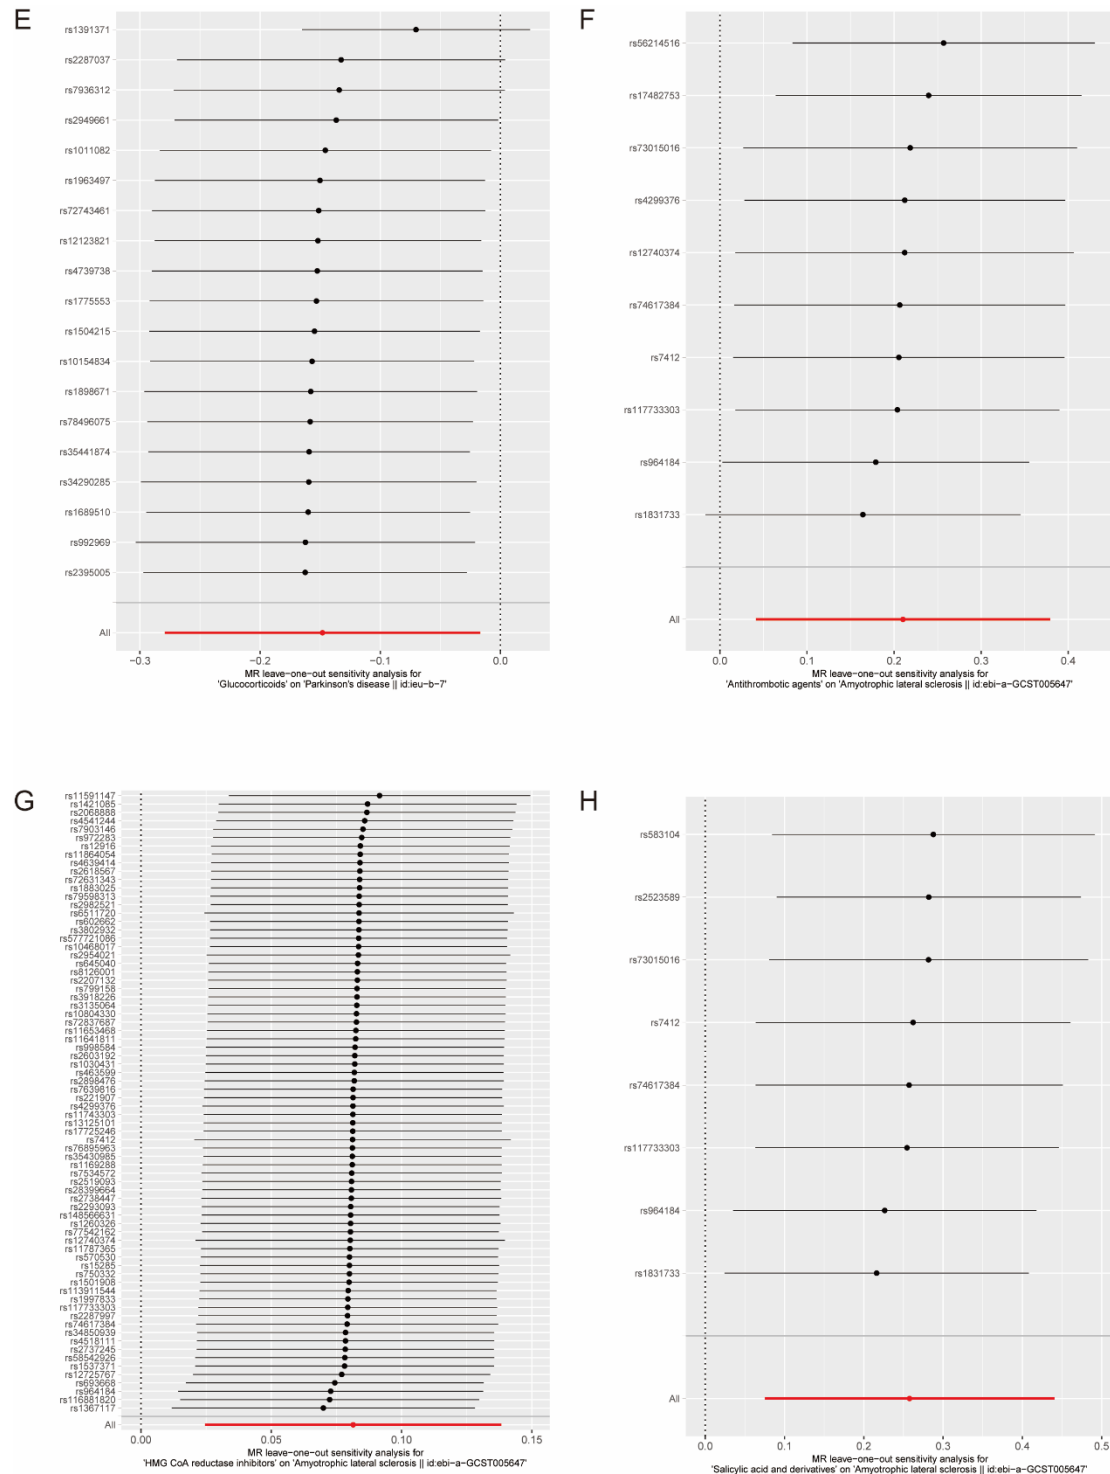

**Figure S2. Forest plots of leave-one out sensitivity analysis between medications and neurodegenerative diseases.** A-B shows the causal effect between thyroid preparations, immunosuppressants and Alzheimer's disease (AD); C-E shows the causal effect between thyroid preparations, immunosuppressants, glucocorticoids and Parkinson's disease (PD); F-H shows the causal effect between antithrombotic agents, HMG CoA reductase inhibitors, salicylic acid and derivatives and Amyotrophic Lateral Sclerosis (ALS).

### #The codes for MR test on associations between medications and AD

```
library(TwoSampleMR)
library(MRInstruments)
setwd("C:\\Users\\Wenjing Wang\\Documents")
```

### Taking the medication category C07 as an example:

#### ##Obtain Genetic Instruments

```
C07_exp_dat <- read_exposure_data(
  filename = "C07_summary.csv",
  sep = ",",
  snp_col = "rsid",
  phenotype_col = "Traits",
  beta_col = "effect",
  se_col = "se",
  effect_allele_col = "a1",
  other_allele_col = "a2",
  eaf_col = "a1_freq",
  pval_col = "p-value",
  samplesize_col = "n"
)
head(C07_exp_dat)

C07_exp_dat <- clump_data(C07_exp_dat)
or
C07_exp_dat <- clump_data(
  C07_exp_dat,
  clump_kb = 10000,
  clump_r2 = 0.001,
  clump_p1 = 1,
  clump_p2 = 1,
  pop = "EUR"
)
```

#### ## Extract Exposure IVs from Outcome GWAS and Harmonize

```
AD_out_dat <- extract_outcome_data(snps=C07_exp_dat$SNP,outcomes='ieu-b-2')
AD2_out_dat <- AD_out_dat[!duplicated(AD_out_dat$SNP), ]
dat <- harmonise_data(C07_exp_dat, AD2_out_dat)
```

#### ## Perform MR Analysis

```
res <- mr(dat)
res
OR <- generate_odds_ratios(res)
OR
```

### ## Pleiotropy

```
pleiotropy <- mr_pleiotropy_test(dat)#Horizontal pleiotropy  
pleiotropy
```

```
mr_presso(BetaOutcome = "beta.outcome", BetaExposure = "beta.exposure", SdOutcome = "se.outcome",  
SdExposure = "se.exposure", OUTLIERtest = TRUE, DISTORTIONtest = TRUE, data = dat, NbDistribution = 1000,  
SignifThreshold = 0.05)
```

### ## Scatter plot

```
p1 <- mr_scatter_plot(res, dat)  
p1[[1]]
```

### ## Leaveoneout

```
res_loo <- mr_leaveoneout(dat)  
p3 <- mr_leaveoneout_plot(res_loo)  
p3[[1]]
```

### ## Forest plot

```
dt <- read.csv("ADMedicationForest.csv")  
dt$"<- paste(rep(" ",20), collapse = " ")  
dt$'OR (95% CI)' <- ifelse(is.na(dt$OR), "",  
                           sprintf("%.3f (%.3f - %.3f)",  
                                   dt$OR, dt$ORlci, dt$ORuci))  
  
forest(dt[,c(1, 2, 3, 7, 8)],  
       est = dt$OR,  
       lower = dt$ORlci,  
       upper = dt$ORuci,  
       ci_column = 4,  
       ref_line = 1)
```

### #The codes for MR test on associations between medications and PD

```
library(TwoSampleMR)  
library(MRInstruments)  
setwd("C:\\Users\\Wenjing Wang\\Documents")
```

### Taking the medication category C07 as an example:

#### ##Obtain Genetic Instruments

```
C07_exp_dat <- read_exposure_data(  
  filename = "C07_summary.csv",  
  sep = ",",  
  snp_col = "rsid",  
  phenotype_col = "Traits",
```

```

    beta_col = "effect",
    se_col = "se",
    effect_allele_col = "a1",
    other_allele_col = "a2",
    eaf_col = "a1_freq",
    pval_col = "p-value",
    samplesize_col = "n"
)
head(C07_exp_dat)

C07_exp_dat <- clump_data(C07_exp_dat)
or
C07_exp_dat <- clump_data(
  C07_exp_dat,
  clump_kb = 10000,
  clump_r2 = 0.001,
  clump_p1 = 1,
  clump_p2 = 1,
  pop = "EUR"
)

## Extract Exposure IVs from Outcome GWAS and Harmonize
PD_out_dat <- extract_outcome_data(snps=C07_exp_dat$SNP,outcomes='ieu-b-7')
PD2_out_dat <- PD_out_dat[!duplicated(PD_out_dat$SNP), ]
dat <- harmonise_data(C07_exp_dat, PD2_out_dat)

## Perform MR Analysis
res <- mr(dat)
res
OR <- generate_odds_ratios(res)
OR

## Pleiotropy
pleiotropy <- mr_pleiotropy_test(dat)#Horizontal pleiotropy
pleiotropy

## Scatter plot
p1 <- mr_scatter_plot(res, dat)
p1[[1]]

## Leaveoneout
res_loo <- mr_leaveoneout(dat)
p3 <- mr_leaveoneout_plot(res_loo)
p3[[1]]

```

## ## Forest plot

```
dt <- read.csv("PDMedicationForest.csv")
dt$"<- paste(rep(" ",20), collapse = " ")
dt$'OR (95% CI)' <- ifelse(is.na(dt$OR), "",
                           sprintf("%.3f (%.3f - %.3f)",
                                   dt$OR, dt$ORlci, dt$ORuci))

forest(dt[,c(1, 2, 3, 7, 8)],
       est = dt$OR,
       lower = dt$ORlci,
       upper = dt$ORuci,
       ci_column = 4,
       ref_line = 1)
```

## #The codes for MR test on associations between medications and ALS

```
library(TwoSampleMR)
library(MRInstruments)
setwd("C:\\Users\\Wenjing Wang\\Documents")
```

## Taking the medication category C07 as an example:

### ##Obtain Genetic Instruments

```
C07_exp_dat <- read_exposure_data(
  filename = "C07_summary.csv",
  sep = ",",
  snp_col = "rsid",
  phenotype_col = "Traits",
  beta_col = "effect",
  se_col = "se",
  effect_allele_col = "a1",
  other_allele_col = "a2",
  eaf_col = "a1_freq",
  pval_col = "p-value",
  samplesize_col = "n"
)
head(C07_exp_dat)

C07_exp_dat <- clump_data(C07_exp_dat)
or
C07_exp_dat <- clump_data(
  C07_exp_dat,
  clump_kb = 10000,
  clump_r2 = 0.001,
```

```

    clump_p1 = 1,
    clump_p2 = 1,
    pop = "EUR"
)

```

### ## Extract Exposure IVs from Outcome GWAS and Harmonize

```

ALS_out_dat <- extract_outcome_data(snp=C07_exp_dat$SNP,outcomes=' ebi-a-GCST005647')
ALS2_out_dat <- ALS_out_dat[!duplicated(ALS_out_dat$SNP), ]
dat <- harmonise_data(C07_exp_dat, ALS2_out_dat)

```

### ## Perform MR Analysis

```

res <- mr(dat)
res
OR <- generate_odds_ratios(res)
OR

```

### ## Pleiotropy

```

pleiotropy <- mr_pleiotropy_test(dat)#Horizontal pleiotropy
pleiotropy

```

### ## Scatter plot

```

p1 <- mr_scatter_plot(res, dat)
p1[[1]]

```

### ## Leaveoneout

```

res_loo <- mr_leaveoneout(dat)
p3 <- mr_leaveoneout_plot(res_loo)
p3[[1]]

```

### ## Forest plot

```

dt <- read.csv("ALSMedicationForest.csv")
dt$"<- paste(rep(" ",20), collapse =" ")
dt$'OR (95% CI)' <- ifelse(is.na(dt$OR), "",
                           sprintf("%.3f (%.3f - %.3f)",
                                   dt$OR, dt$ORlci, dt$ORuci))

forest(dt[,c(1, 2, 3, 7, 8)],
      est = dt$OR,
      lower = dt$ORlci,
      upper = dt$ORuci,
      ci_column = 4,
      ref_line = 1)

```
